# Supplementary material
Source: MDPI journal article supplement (https://www.mdpi.com/2304-6740/10/7/87)
Supplement: s1 [file s1]

# Synthesis of Hierarchically Ordered Porous Silica Materials for CO<sub>2</sub> Capture: The Role of Pore Structure and Functionalized Amine

Xiaoqi Jin \*, Jinlong Ge, Liyuan Zhang, Zhong Wu, Linlin Zhu and Mingwen Xiong

School of Materials and Chemical Engineering, Bengbu University, Bengbu 233030, China;

\* Correspondence: l3167526736@163.com

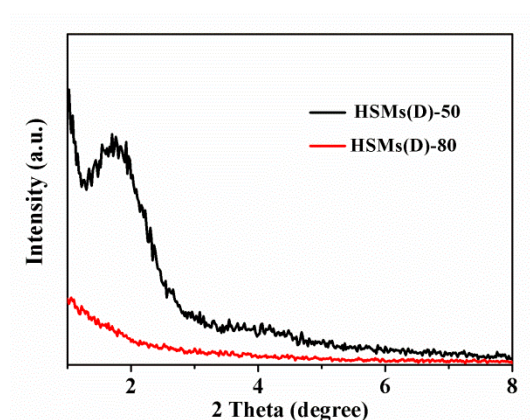

Figure S1. XRD patterns of HSMs(D)-50 and HSMs(D)-80.

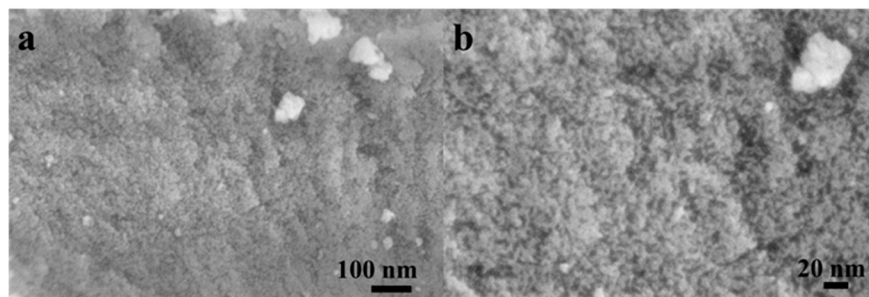

Figure S2. SEM images of HSMs(DC)-0.15.

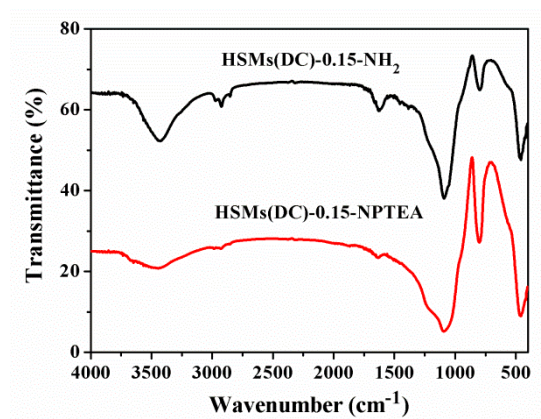

Figure S3. FTIR spectra of HSMs(DC)-0.15-NH<sub>2</sub> and HSMs(DC)-0.15-NPTEA.

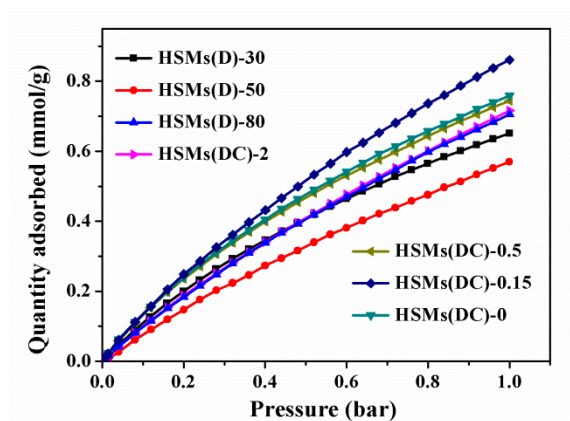

Figure S4. CO<sub>2</sub> adsorption isotherms at 298 K of samples.
